# Supplementary material
Source: publisher site journal article supplement (https://static.cambridge.org/content/id/urn:cambridge.org:id:article:S1834490919000205/resource/name/S1834490919000205supp001.xlsx)
Supplement: Supplementary file 1 [file S1834490919000205supp001.xlsx]

## Sheet: Sheet1
Experiment 1				Experiment 2
NRP		RP-		NRP		RP-
Animals	Artifacts	Animals	Artifacts	Animals	Artifacts	Animals	Artifacts
2	3	1	4	9	8	3	2
4	5	5	2	8	14	4	1
9	3	1	2	10	7	6	3
5	4	1	2	12	10	5	4
5	2	2	3	11	8	5	3
1	3	2	4	8	10	5	4
7	6	5	4	12	8	5	8
8	2	5	2	9	7	3	6
8	5	3	5	11	10	4	5
4	4	1	0	10	6	5	3
6	7	0	1	10	8	6	5
5	2	0	1	11	6	4	3
4	3	2	2	9	14	5	2
3	3	1	0	9	4	1	3
3	3	1	2	7	9	6	2
3	4	0	1	13	10	8	2
2	4	1	1	9	11	4	3
5	2	1	0	9	10	6	3
5	4	2	1	11	7	4	3
4	6	1	0	9	11	6	4
7	8	3	0	8	13	4	3
6	4	3	2	3	10	4	3
10	3	2	4	12	8	5	6
6	5	2	1	8	14	1	3
6	3	3	4	10	15	5	0
5	7	3	4	7	11	4	4
7	4	1	2	10	11	0	1
12	8	2	3	14	10	6	2
9	9	0	2	11	7	0	1
8	4	2	1	9	4	1	5
6	2	3	0	13	5	7	3
6	6	2	1	10	14	3	6
7	7	6	1
6	3	2	2
7	4	1	3
6	7	1	0
8	3	0	3
2	2	4	5
5	3	0	1
9	4	4	1
2	3	1	2
7	4	3	1
4	5	3	1
6	1	2	4
7	5	1	2
6	3	1	3
6	4	3	4
6	7	4	1
7	8	4	2
5	4	6	2
3	4	1	2
7	4	5	4
7	3	3	1
7	5	2	2
7	5	1	1
7	6	2	2
4	4	1	4
8	6	2	1
4	4	1	1
9	3	2	4
7	5	2	1
5	1	2	4
6	1	2	2
7	6	4	1
